# Supplementary material for: Experimental and theoretical characterization of molecular complexes formed between OCS and XY molecules (X, Y = F, Cl and Br) and their role in photochemical matrix reactions
Source: Royal Society of Chemistry journal article supplement (doi:10.1039/b914862k), 2009-11-12
Supplement: b914862k.pdf [file b914862k.pdf]

**Experimental and Theoretical Characterization of Molecular  
Complexes Formed between OCS and XY Molecules (X, Y = F, Cl and  
Br) and their Role in Photochemical Matrix Reactions**

**Supplementary Information**

**A. Lorena Picone, Carlos O. Della Védova, Helge Willner, Anthony J. Downs, and Rosana M. Romano \***

**Table S1.** Geometric parameters for the different complexes formed between OCS and ClF, Cl<sub>2</sub>, Br<sub>2</sub>, or BrCl, (distances in Å, angles in degrees) calculated using the B3LYP method and the aug-cc-pVDZ for all the atoms with the exception of Br atoms in the Br<sub>2</sub> complexes for which the LANL2DZ basis set was used (S=C=O...Br<sub>2</sub> (II) were optimized with the B3LYP/6-31+G\* approximation)

|                            | $r_{\text{CO}}$ | $\Delta r_{\text{CO}}^a$ | $r_{\text{CS}}$ | $\Delta r_{\text{CS}}^b$ | $r_{\text{XY}}$ | $\Delta r_{\text{XY}}^c$ | $\alpha^d$ | $r^e$ | $d_p^f$ |
|----------------------------|-----------------|--------------------------|-----------------|--------------------------|-----------------|--------------------------|------------|-------|---------|
| OCS...FCl (I)              | 1.163           | $-2. \times 10^{-5}$     | 1.579           | $-1 \times 10^{-4}$      | 1.675           | +0.001                   | 76.6       | 3.548 | -0.25   |
| OCS...FCl (II)             | 1.164           | +0.001                   | 1.579           | $-4 \times 10^{-4}$      | 1.674           | $+5. 10^{-4}$            | 180.0      | 3.425 | -0.12   |
| OCS...ClF                  | 1.159           | -0.004                   | 1.587           | +0.008                   | 1.698           | +0.024                   | 93.8       | 2.943 | 0.62    |
| SCO...FCl                  | 1.163           | $-3 \times 10^{-4}$      | 1.579           | $+2 \times 10^{-4}$      | 1.674           | $-7 \times 10^{-5}$      | 90.1       | 3.327 | -0.31   |
| SCO...ClF (I)              | 1.166           | +0.003                   | 1.575           | -0.004                   | 1.678           | +0.004                   | 142.7      | 2.819 | 0.46    |
| SCO...ClF (II)             | 1.165           | +0.002                   | 1.575           | -0.004                   | 1.677           | +0.003                   | 180.0      | 2.863 | 0.42    |
| OCS...Cl <sub>2</sub>      | 1.162           | -0.001                   | 1.582           | +0.003                   | 2.056           | +0.010                   | 98.0       | 3.354 | 0.21    |
| SCO...Cl <sub>2</sub> (I)  | 1.164           | +0.001                   | 1.577           | -0.002                   | 2.048           | +0.002                   | 180.0      | 3.119 | 0.16    |
| SCO...Cl <sub>2</sub> (II) | 1.165           | +0.002                   | 1.577           | -0.002                   | 2.048           | +0.002                   | 147.1      | 3.110 | 0.17    |
| OCS...Br <sub>2</sub>      | 1.159           | -0.004                   | 1.587           | +0.008                   | 2.540           | +0.030                   | 93.8       | 3.138 | 0.51    |
| SCO...Br <sub>2</sub> (I)  | 1.165           | +0.002                   | 1.576           | -0.003                   | 2.513           | +0.003                   | 136.0      | 3.120 | 0.25    |
| SCO...Br <sub>2</sub> (II) | 1.168           | +0.002                   | 1.568           | -0.004                   | 2.327           | +0.003                   | 177.8      | 2.895 | 0.47    |
| OCS...ClBr                 | 1.162           | -0.001                   | 1.582           | +0.003                   | 2.199           | +0.009                   | 93.0       | 3.373 | 0.19    |
| OCS...BrCl                 | 1.160           | -0.003                   | 1.585           | +0.006                   | 2.209           | +0.019                   | 96.9       | 3.210 | 0.44    |
| SCO...ClBr                 | 1.164           | +0.001                   | 1.578           | -0.001                   | 2.192           | +0.002                   | 180.0      | 3.263 | 0.02    |
| SCO...BrCl                 | 1.165           | +0.002                   | 1.576           | -0.003                   | 2.193           | +0.003                   | 180.0      | 3.075 | 0.29    |

<sup>a</sup>  $\Delta r_{\text{CO}} = r_{\text{CO complex}} - r_{\text{CO free OCS}}$

<sup>b</sup>  $\Delta r_{\text{CS}} = r_{\text{CS complex}} - r_{\text{CS free OCS}}$

<sup>c</sup>  $\Delta r_{\text{XY}} = r_{\text{XY}} - r_{\text{XY free XY}}$

<sup>d</sup> Intermolecular angle CE...X (E = O, S and X = halogen)

<sup>e</sup> Intermolecular distance E...X (E = O, S, or X = halogen)

<sup>f</sup> van der Waals penetration distance,  $d_p$

**Table S2.** Theoretical IR spectra (wavenumbers in  $\text{cm}^{-1}$ ) of the different complexes formed between OCS and ClF calculated using the B3LYP/aug-cc-pVDZ approximation. Predicted IR intensities are given in parentheses

| OCS...FCI (I)  | OCS...FCI (II)           | OCS...ClF      | SCO...FCI      | SCO...ClF(I)   | SCO...ClF(II)            | assignment <sup>a</sup>   |
|----------------|--------------------------|----------------|----------------|----------------|--------------------------|---------------------------|
| 2095.9 (100.0) | 2093.6 (100.0)           | 2108.8 (100.0) | 2096.9 (100.0) | 2085.4 (100.0) | 2092.2 (100.0)           | $\nu_{\text{CO}}$         |
| 868.1 (1.1)    | 868.5 (0.8)              | 853.0 (1.4)    | 867.6 (1.14)   | 876.8 (0.4)    | 876.4 (0.5)              | $\nu_{\text{CS}}$         |
| 774.7 (2.6)    | 781.2 (3.9)              | 705.4 (24.6)   | 779.5 (3.7)    | 767.8 (6.6)    | 775.1(5.6)               | $\nu_{\text{ClF}}$        |
| 509.8 (0.3)    |                          | 503.2 (0.3)    | 509.8 (0.3)    | 506.5 (0.2)    |                          | $\delta_{\text{oop OCS}}$ |
| 508.0 (0.4)    | 510.9 (0.3) <sup>b</sup> | 508.0 (0.2)    | 508.6 (0.5)    | 509.4 (0.2)    | 505.9 (0.2) <sup>b</sup> | $\delta_{\text{OCS}}$     |
| 35.1 (0.1)     | 30.1 (0.1) <sup>b</sup>  | 133.2 (<0.1)   | 35.7 (0.1)     | 90.7 (0.1)     | 81.5 (0.1) <sup>b</sup>  | $\delta_{\text{EXY}}$     |
| 29.6 (0.2)     |                          | 117.0 (<0.1)   | 21.2 (0.1)     | 88.0 (0.1)     |                          | $\delta_{\text{oop EXY}}$ |
| 20.0 (<0.1)    | 24.9 (<0.1)              | 93.1 (1.0)     | 18.8 (<0.1)    | 69.8 (0.3)     | 57.9 (0.1)               | $\nu_{\text{EX}}$         |
| 4.3 (<0.1)     | 8.3 (<0.1) <sup>b</sup>  | 37.3 (<0.1)    | 11.9 (<0.1)    | 13.4 (<0.1)    | 7.4 (<0.1) <sup>b</sup>  | $\delta_{\text{CEX}}$     |

<sup>a</sup> E = O, S, or X, Y = F or Cl.

<sup>b</sup> Doubly degenerate.

**Table S3.** Theoretical IR spectra (wavenumbers in  $\text{cm}^{-1}$ ) of the different complexes formed between OCS and  $\text{Cl}_2$  calculated using the B3LYP/aug-cc-pVDZ approximation. Predicted IR intensities are given in parentheses

| OCS...Cl <sub>2</sub> | SCO...Cl <sub>2</sub> (I) | SCO...Cl <sub>2</sub> (II) | assignment <sup>a</sup>     |
|-----------------------|---------------------------|----------------------------|-----------------------------|
| 2099.9 (100.0)        | 2094.0 (100.0)            | 2091.8 (100.0)             | $\nu_{\text{CO}}$           |
| 862.1 (1.5)           | 872.3 (0.8)               | 872.1 (0.8)                | $\nu_{\text{CS}}$           |
| 509.4 (0.4)           | 508.2 (0.2) <sup>b</sup>  | 508.0 (0.2)                | $\delta_{\text{OCS}}$       |
| 507.2 (0.3)           |                           | 508.0 (0.2)                | $\delta_{\text{oop OCS}}$   |
| 502.2 (1.6)           | 523.8 (0.1)               | 523.9 (0.1)                | $\nu_{\text{ClCl}}$         |
| 66.1 (<0.1)           | 49.0 (<0.1) <sup>b</sup>  | 54.0 (<0.1)                | $\delta_{\text{ECICl}}$     |
| 47.3 (<0.1)           |                           | 42.9 (<0.1)                | $\delta_{\text{oop ECICl}}$ |
| 44.0 (0.2)            | 33.0 (<0.1)               | 36.9 (<0.1)                | $\nu_{\text{ECI}}$          |
| 18.5 (<0.1)           | 14.9 (<0.1)               | 12.0 (<0.1)                | $\delta_{\text{CECl}}$      |

<sup>a</sup> E = O or S.

<sup>b</sup> Doubly degenerate.

**Table S4.** Theoretical IR spectra (wavenumbers in  $\text{cm}^{-1}$ ) of the different complexes formed between OCS and  $\text{Br}_2$  calculated using the B3LYP method and the aug-cc-pVDZ for all the atoms with the exception of Br atoms for which the LANL2DZ basis set was used ( $\text{S}=\text{C}=\text{O}\cdots\text{Br}_2$  (II) were optimized with the B3LYP/6-31+G\* approximation). Predicted IR intensities are given in parentheses

| OCS $\cdots\text{Br}_2$ | SCO $\cdots\text{Br}_2$ (I) | SCO $\cdots\text{Br}_2$ (II) | assignment <sup>a</sup>     |
|-------------------------|-----------------------------|------------------------------|-----------------------------|
| 2103.9 (100.0)          | 2088.6 (100)                | 2102.9 (100.0)               | $\nu_{\text{CO}}$           |
| 853.0 (2.3)             | 873.5 (0.6)                 | 881.3 (0.6)                  | $\nu_{\text{CS}}$           |
| 504.0 (0.3)             | 508.8 (0.2)                 | 509.4 (0.3)                  | $\delta_{\text{oop OCS}}$   |
| 504.0 (0.1)             | 510.6 (0.2)                 | 509.2 (0.3)                  | $\delta_{\text{OCS}}$       |
| 249.6 (2.1)             | 268.8 (0.1)                 | 323.9 (0.2)                  | $\nu_{\text{BrBr}}$         |
| 84.0 (1.0)              | 59.1 (0.2)                  | 77.5 (<0.1)                  | $\delta_{\text{EBrBr}}$     |
| 56.5 (0.2)              | 37.8 (<0.1)                 | 75.0 (<0.1)                  | $\delta_{\text{oop EBrBr}}$ |
| 42.9 (<0.1)             | 32.4 (<0.1)                 | 56.4(0.1)                    | $\nu_{\text{EBr}}$          |
| 25.2 (<0.1)             | 11.1 (<0.1)                 | 28.2 (<0.1)                  | $\delta_{\text{CEBr}}$      |

<sup>a</sup> E = O or S.

**Table S5.** Theoretical IR spectra (wavenumbers in  $\text{cm}^{-1}$ ) of the different complexes formed between OCS and  $\text{Cl}_2$  calculated using the B3LYP/aug-cc-pVDZ approximation. Predicted IR intensities are given in parentheses

| OCS...ClBr     | OCS...BrCl     | SCO...ClBr               | SCO...BrCl      | assignment                |
|----------------|----------------|--------------------------|-----------------|---------------------------|
| 2098.6 (100.0) | 2104.0 (100.0) | 2094.8 (100.0)           | 2091.9 (100.0)  | $\nu_{\text{CO}}$         |
| 862.8 (1.5)    | 855.7 (1.9)    | 870.8 (1.0)              | 875.4 (0.6)     | $\nu_{\text{CS}}$         |
| 508.8 (0.2)    | 508.0 (0.1)    | 508.8 (0.2) <sup>b</sup> | 507.0 deg.(0.2) | $\delta_{\text{OCS}}$     |
| 507.7(0.3)     | 504.7(0.3)     |                          |                 | $\delta_{\text{oop OCS}}$ |
| 405.4 (0.6)    | 395.5 (3.6)    | 421.3 (<0.1)             | 419.9 (0.5)     | $\nu_{\text{BrCl}}$       |
| 58.0 (<0.1)    | 76.8 (0.3)     | 47.6 (<0.1) <sup>b</sup> | 49.2 deg.<0.1)  | $\delta_{\text{EXY}}$     |
| 44.1 (0.1)     | 61.3 (0.3)     | 25.3 (<0.1)              | 43.7 (<0.1)     | $\nu_{\text{EX}}$         |
| 38.5 (<0.1)    | 55.7 (<0.1)    |                          |                 | $\delta_{\text{oop EXY}}$ |
| 19.4 (<0.1)    | 27.5 (<0.1)    | 16.4 (<0.1)              | 9.6 deg.<0.1)   | $\delta_{\text{CEX}}$     |

<sup>a</sup> E = O or S.

<sup>b</sup> Doubly degenerate.

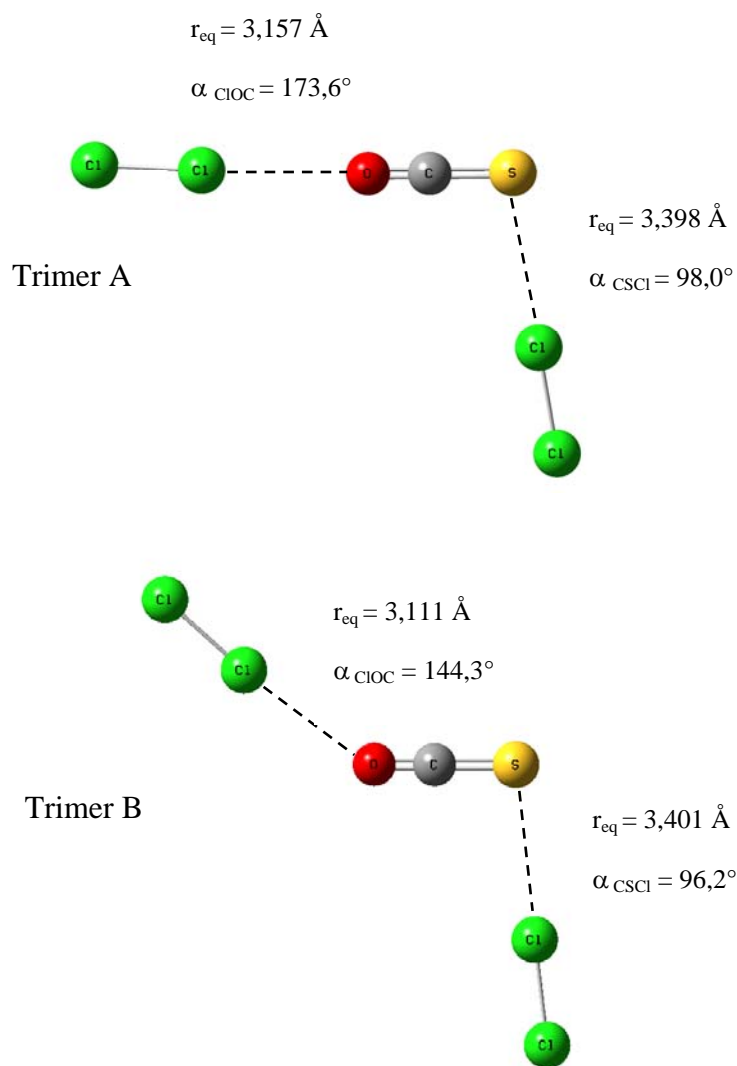

**Figure S1.** Molecular models of the trimers formed between OCS and Cl<sub>2</sub> calculated with the B3LYP/6-31+G\* approximation.
